# Supplementary material
Source: PubMed Central journal article supplement (PMC7745259)
Supplement: NIHMS1645791-supplement-Document_S1.pdf [file NIHMS1645791-supplement-Document_S1.pdf]

**Cell Reports, Volume 33**

**Supplemental Information**

**A Systematic Protein Turnover Map  
for Decoding Protein Degradation**

**Romain Christiano, Henning Arlt, Sonja Kabatnik, Niklas Mejhert, Zon Weng Lai, Robert V. Farese Jr., and Tobias C. Walther**

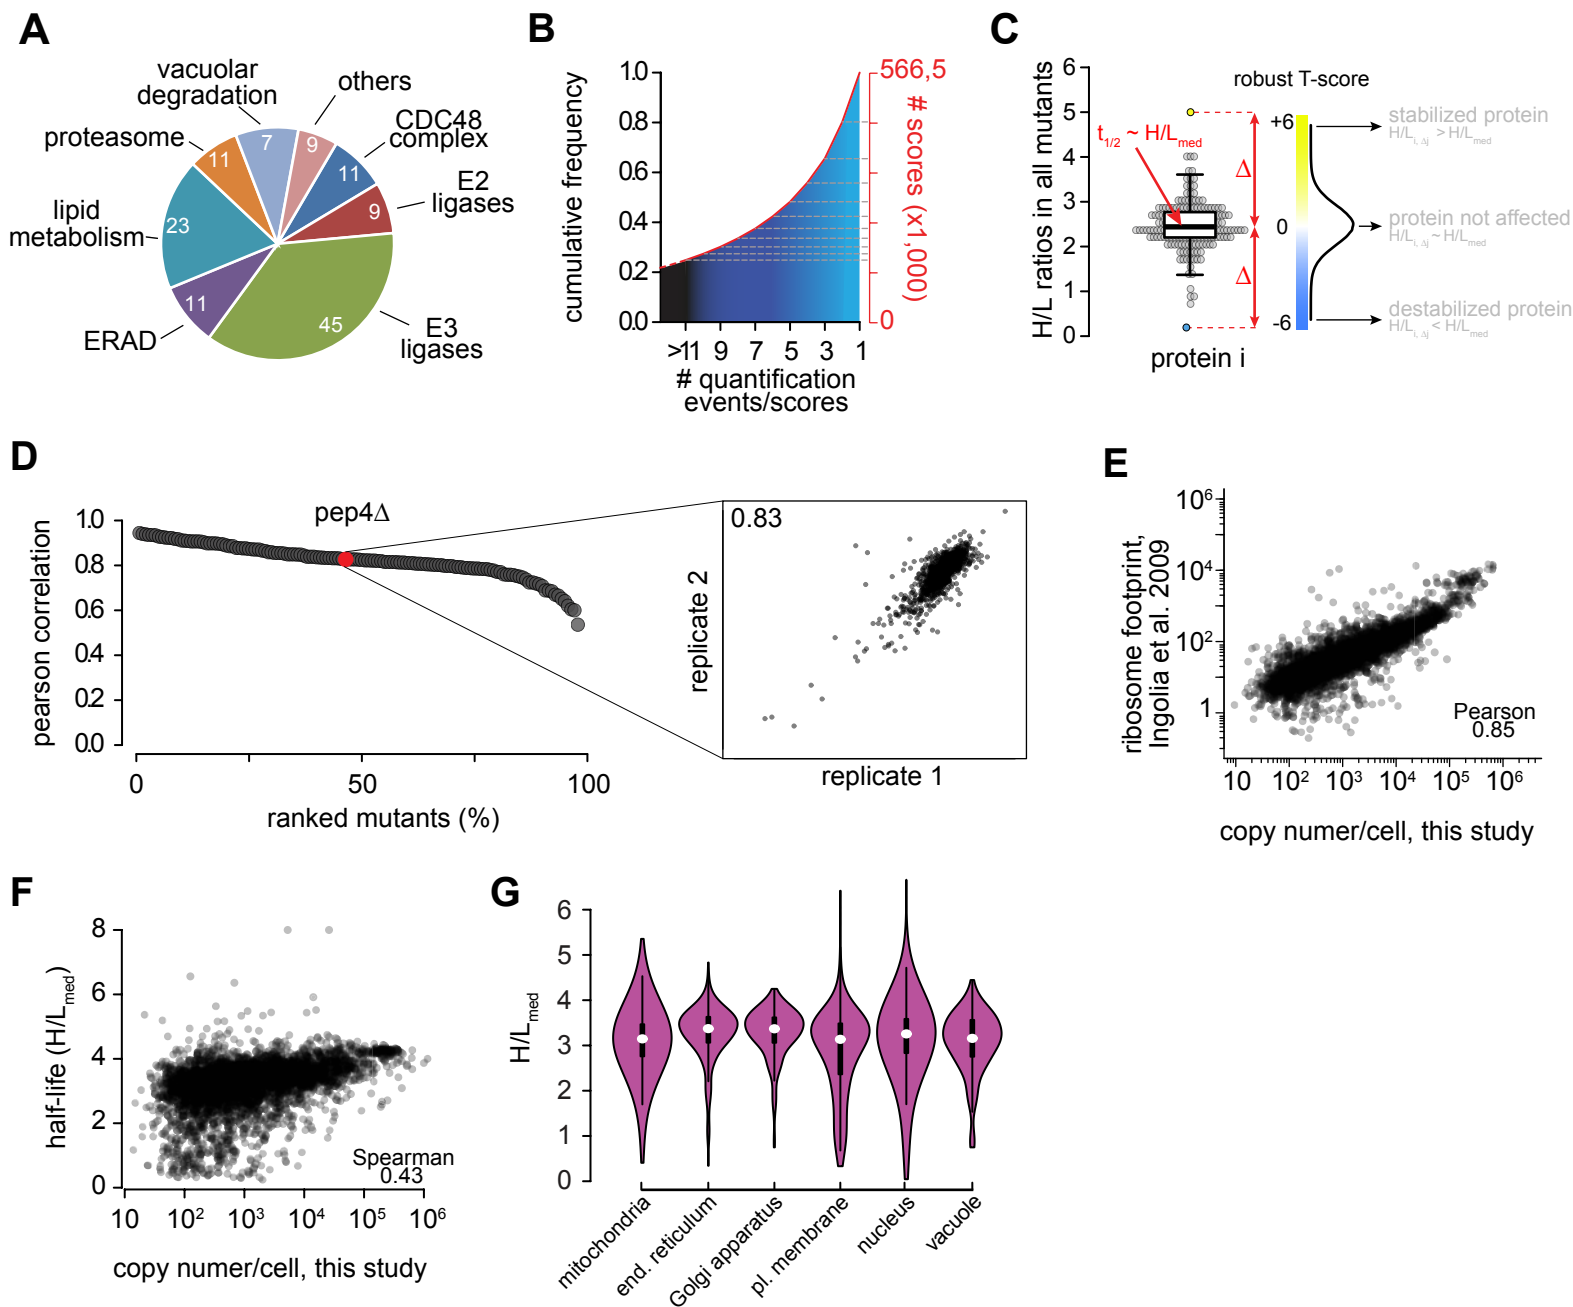

**Suppl. Figure 1: Quality of Turnover Data, Related to Figure 1** (A) Pie chart of mutants included in the T-MAP categorized by biological function (described in Table S1). (B) Cumulative frequency of the number of scores (proteins quantified) in the T-MAP as a function of quantification events/score. (C) Scoring function for quantitative turnover analysis identifies destabilizing ( $H/L_{i,\Delta j} < H/L_{med}$ ), stabilizing ( $H/L_{i,\Delta j} > H/L_{med}$ ) and neutral ( $H/L_{i,\Delta j} \sim H/L_{med}$ ) effects of mutant  $\Delta j$  on protein *i*. (D) Reproducibility of turnover profiling between independent biological duplicates (coefficient of correlation) for each mutant in the screen. Inlay shows as an example the reproducibility between biological replicates of *pep4* $\Delta$ . (E) Correlation of protein abundance measurements determined in this study to ribosome footprint data from Ingolia et al., 2009 (Pearson correlation coefficient: 0.85). (F) Correlation between protein abundance and protein turnover determined in this study (Spearman correlation coefficient: 0.43). (G) Distribution of protein turnover ( $H/L_{med}$ ) in different organelles. Abbreviations: end., endoplasmic; pl., plasma.

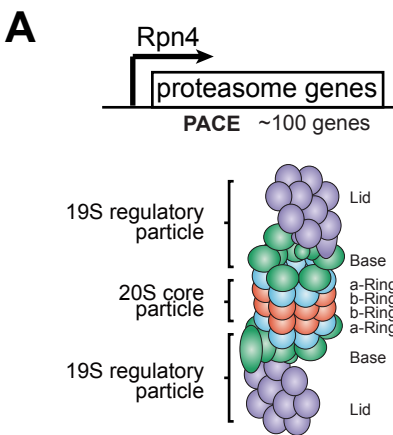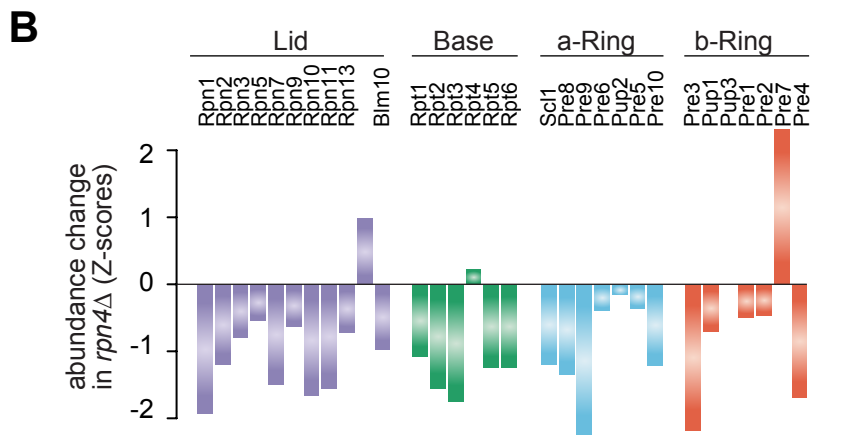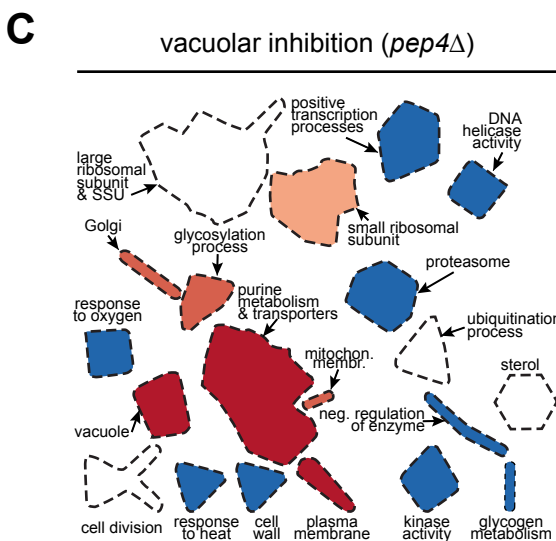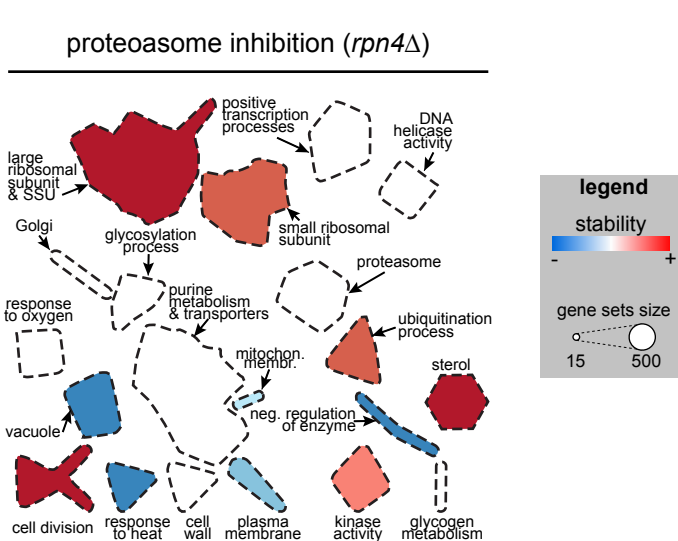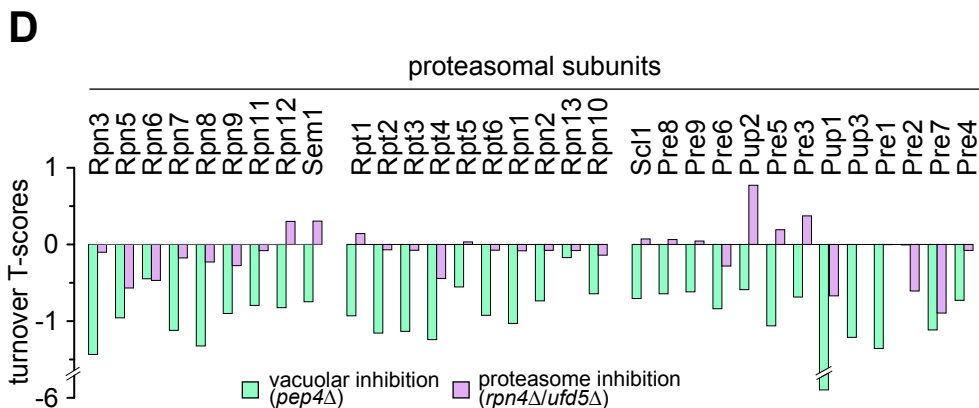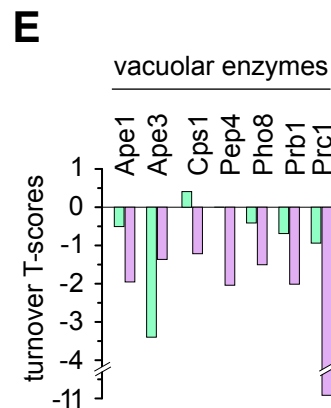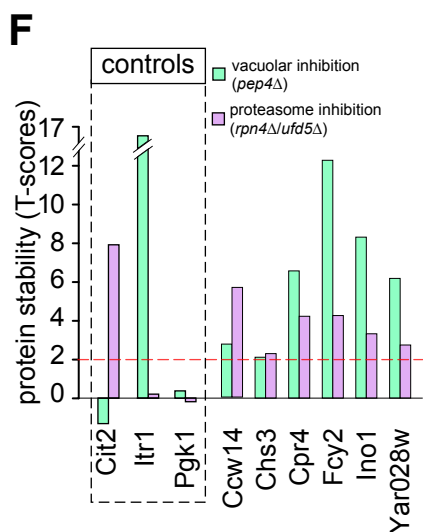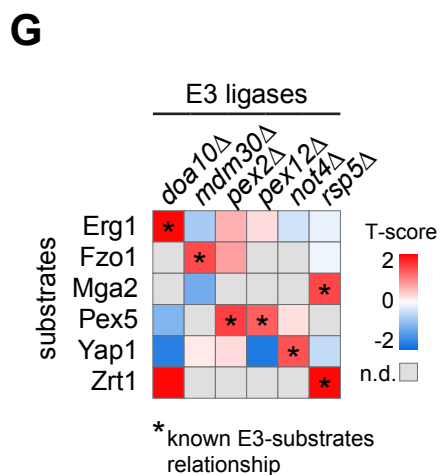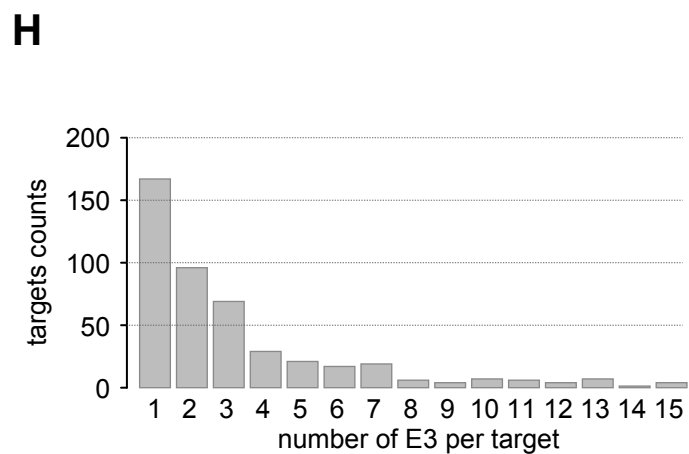

**Suppl. Figure 2: Coordination between Proteasomal and Vacuolar Responses, Related to Figure 2** (A) Schematic of the 26S proteasome. The 26S proteasome consists of the catalytic 20S proteasome (a barrel of four stacked rings: two outer rings and two inner rings) and the 19S regulatory particle (RP, also known as PA700). (B) Abundance fold-change of proteasome subunit in *rpn4Δ* cells. (C) Simplified version of figure 2A showing separately the effects of vacuolar and proteasomal inhibition on proteome stability. (D) Stability (T-scores) of 26S proteasome subunits in *rpn4Δ* and *pep4Δ*. (E) Stability (T-scores) of vacuolar enzymes in *rpn4Δ* and *pep4Δ*. (F) Six proteins are stabilized by impairing either proteasomal or vacuolar degradation. Itr1 is only affected by vacuolar degradation, Cit2 by proteasomal degradation, and Pgk1 is an unaffected, long-lived protein. (G) Examples of known E3 substrates identified in our T-MAP. Asterisks indicates known E3 ligase-substrate relationships. Squares are color coded by T-scores; n.d., no data. (H) Distribution of E3 effects on 457 proteins stabilized in at least one E3 ligase mutant strain.

**A**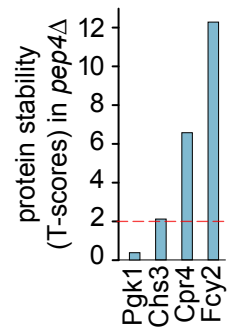**B**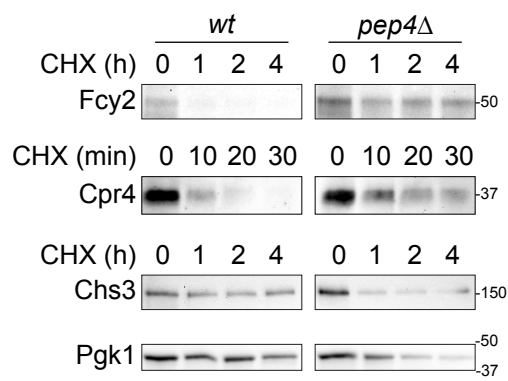**C**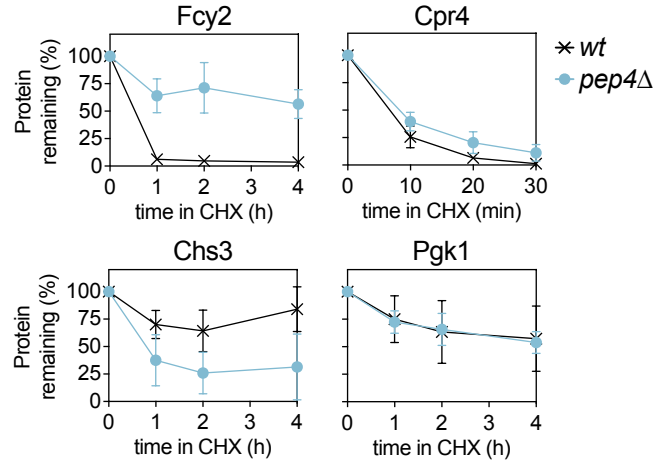**D**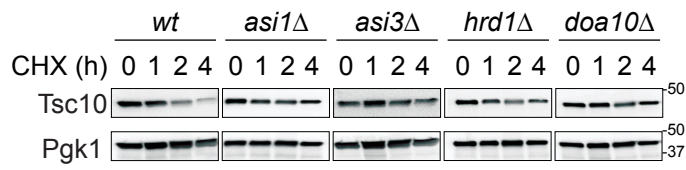

**Suppl. Figure 3: Validation of Turnover Measurements Using Cycloheximide Chase Experiments, Related to Figure 2 and 4.** (A) T-scores of selected proteins changes to various degrees in *pep4Δ* strain. (B) Turnover measurements of proteins in (C) after inhibition of protein synthesis using 250  $\mu\text{g/ml}$  cycloheximide. Indicated genes were endogenously tagged with C-terminal 3xFLAG and proteins were detected using anti-FLAG or anti-Pgk1 antibodies. Molecular weight marker bands indicated on the right in kDa. (C) Quantification of experiment in A from 3 independent repeats. Error bars indicate standard deviation. (D) Degradation of GFP-Tsc10 after inhibition of protein synthesis by 50  $\mu\text{g/ml}$  cycloheximide in wildtype, *asi1Δ*, *asi3Δ*, *doa10Δ*, and *hrd1Δ*. Molecular weight marker bands indicated on the right in kDa.

**A**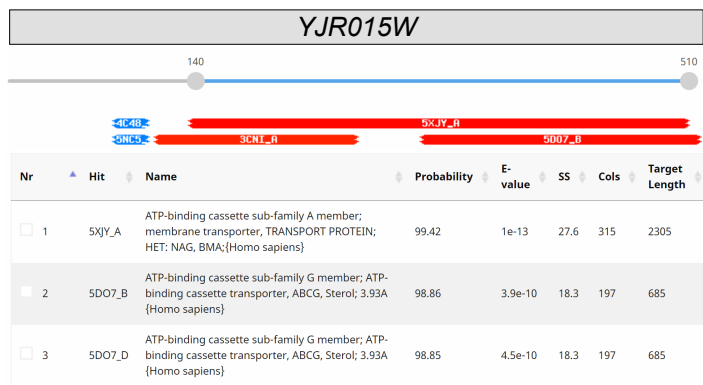**B**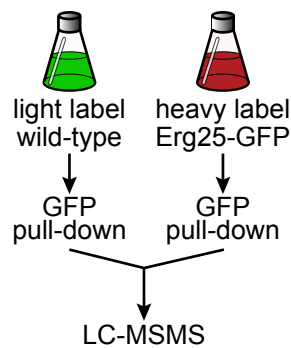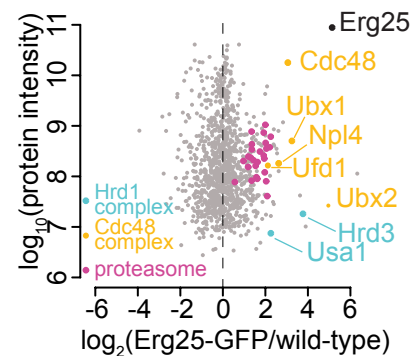**C**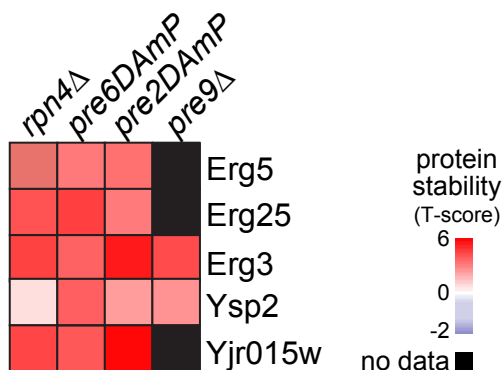

**Suppl. Figure 4: Systematic Prediction of Targets for the HRD1 Branch of ERAD, Related to Figure 3.**

(A) HHPred alignment of *YJR015W*. (B) Erg25 physically interacts with the Hrd1 complex, Cdc48 complex, and proteasome. (left) Experimental design of SILAC-based affinity purification and MS analysis of “heavy”-labeled cells expressing GFP-tagged Erg25 and untagged control cells. (right) Protein intensities are plotted against normalized heavy/light SILAC ratios. (C) T-scores of Hrd1 targets in cells with impaired proteasomal activity deleted for either *RPN4* or *PRE9* or expressing the DAMP allele of the essential genes *PRE2* and *PRE6*. Black squares indicate no data.
